# Supplementary material for: The effects of a maternal advanced glycation end product-rich diet on somatic features, reflex ontogeny and metabolic parameters of offspring mice
Source: Royal Society of Chemistry journal article supplement (doi:10.1039/c8fo00183a), 2018-01-01
Supplement: c8fo00183a1.pdf [file c8fo00183a1.pdf]

Supplementary file

Figure S1: Inclined Board Test results in offspring of dams fed during pregnancy a standard diet or a diet rich in advanced glycation end products

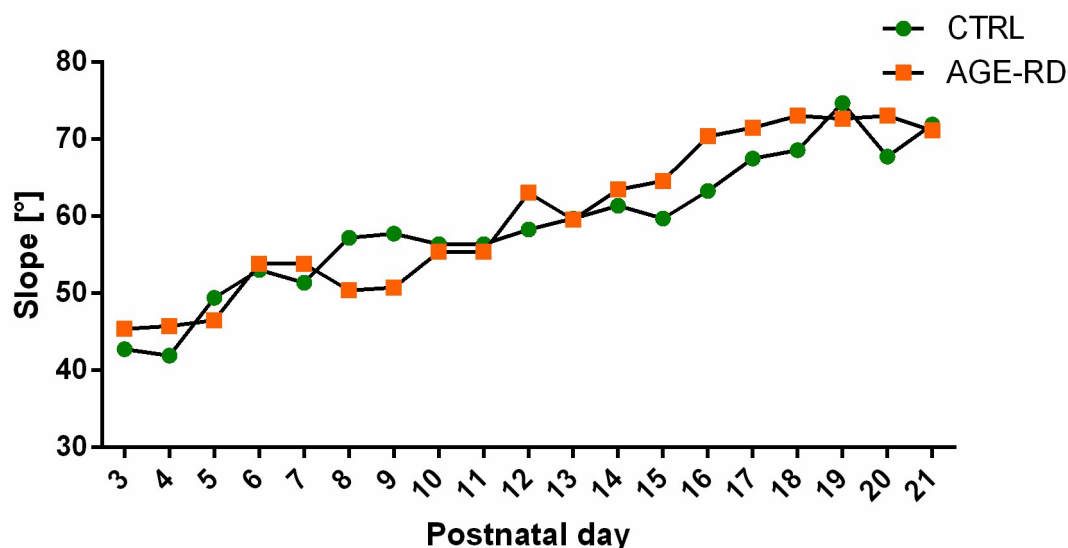

CTRL offspring of dams consuming during pregnancy a control diet, n=18; AGE-RD: offspring of dams consuming during pregnancy advanced glycation end products-rich diet (25% bread crusts/75% standard chow; w/w), n=13. Animal was placed on a polystyrene board, which was gradually elevated by 5 degrees. The maximum angle (x-axis= slope) at which the animal could maintain its position on the inclined board for 5 sec. was recorded. Test was evaluated using repeated measures ANOVA; mean angles in each time point are given; significance: performance over time:  $p < 0.001$ ; between group performance:  $p = 0.401$
